# Supplementary material for: Genome Mining Associated with Analysis of Structure, Antioxidant Activity Reveals the Potential Production of Levan-Rich Exopolysaccharides by Food-Derived Bacillus velezensis VTX20
Source: MDPI journal article supplement (doi:10.3390/app11157055), 2021-07-30
Supplement: s1 [file s1]

**Table S1.** Closest species, by 16S rRNA gene similarity, of EPS-producing bacteria isolated from traditional soybean fermented pastes

| Isolate                                                                                                                                                                                                                                                                                                                                                                                                                                                                                             | Closest bacteria in database           | Identification                | Similarities (%) |
|-----------------------------------------------------------------------------------------------------------------------------------------------------------------------------------------------------------------------------------------------------------------------------------------------------------------------------------------------------------------------------------------------------------------------------------------------------------------------------------------------------|----------------------------------------|-------------------------------|------------------|
|  <p><b>Copyright:</b> ©<br/>2021 by the au-<br/>thors. Licensee<br/>MDPI, Basel,<br/>Switzerland.<br/>This article is an<br/>open access ar-<br/>ticle distributed<br/>under the terms<br/>and conditions<br/>of the Creative<br/>Commons At-<br/>tribution (CC<br/>BY) license<br/>(<a href="http://creativecommons.org/licenses/by/4.0/">http://crea-<br/>tivecom-<br/>mons.org/li-<br/>censes/by/4.0/</a>).</p> |                                        |                               |                  |
| VTX22                                                                                                                                                                                                                                                                                                                                                                                                                                                                                               | <i>Bacillus subtilis</i> IAM 12118     | <i>Bacillus subtilis</i>      | 99.88            |
| VTX25                                                                                                                                                                                                                                                                                                                                                                                                                                                                                               | <i>Paracoccus aerius</i> 011410        | <i>Paracoccus aerius</i>      | 99.89            |
| VTX6                                                                                                                                                                                                                                                                                                                                                                                                                                                                                                | <i>Variovorax paradoxus</i> NBRC 15149 | <i>Variovorax paradoxus</i>   | 99.55            |
| VTX20                                                                                                                                                                                                                                                                                                                                                                                                                                                                                               | <i>Bacillus velezensis</i> FZB42       | <i>Bacillus velezensis</i>    | 98.3             |
| VTX18                                                                                                                                                                                                                                                                                                                                                                                                                                                                                               | <i>Bacillus licheniformis</i> DSM      | <i>Bacillus licheniformis</i> | 99.68            |
| VCN28                                                                                                                                                                                                                                                                                                                                                                                                                                                                                               | <i>Enterococcus avium</i> ATCC 14025   | <i>Enterococcus avium</i>     | 100              |

**Table S2.** Genomic feature of the strain VTX20

| Features                 | Chromosome |
|--------------------------|------------|
| Genome size (bp)         | 3,891,321  |
| G + C content (%)        | 46.1       |
| Genes (total)            | 3,834      |
| CDSs (coding)            | 3,670      |
| rRNAs                    | 27         |
| tRNAs                    | 86         |
| ncRNAs                   | 5          |
| Pseudogenes              | 46         |
| CRISPR                   | 1          |
| GenBank accession number | CP075054   |

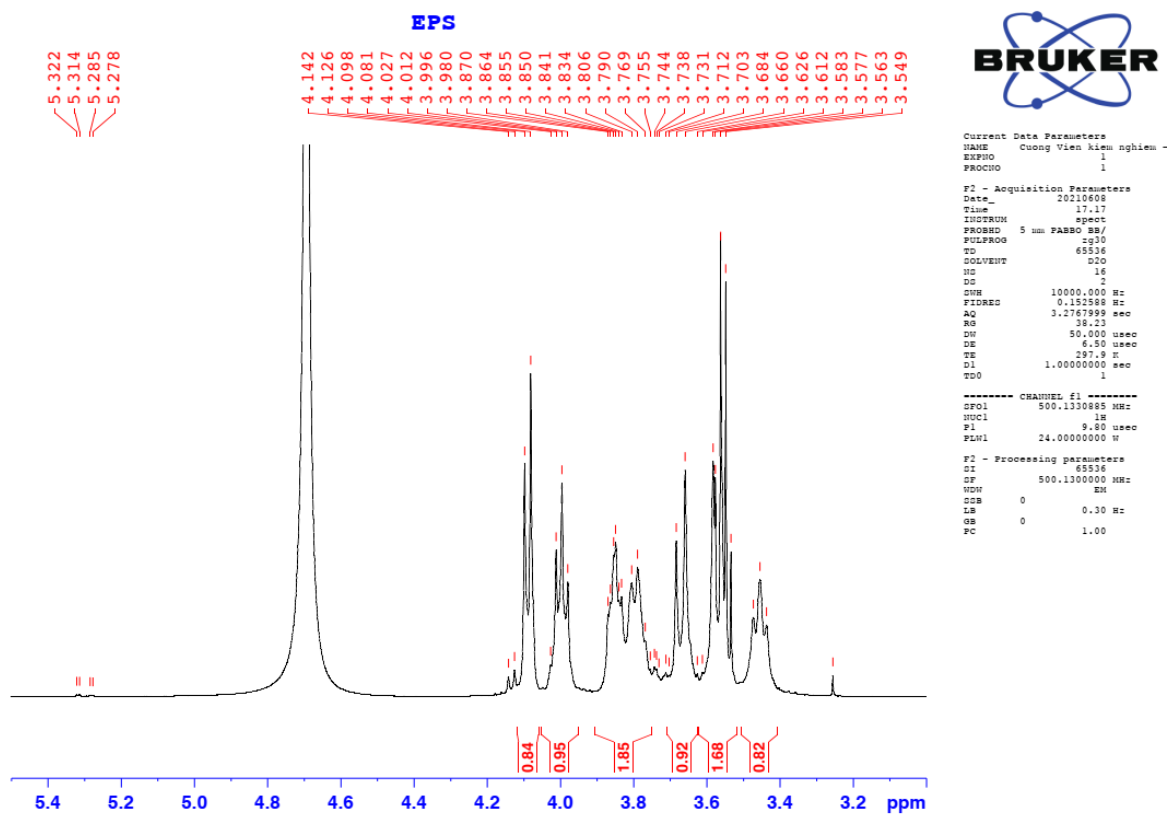**Figure S1.**  $^1\text{H}$  NMR of the dialyzed EPS from *B. velezensis* VTX20

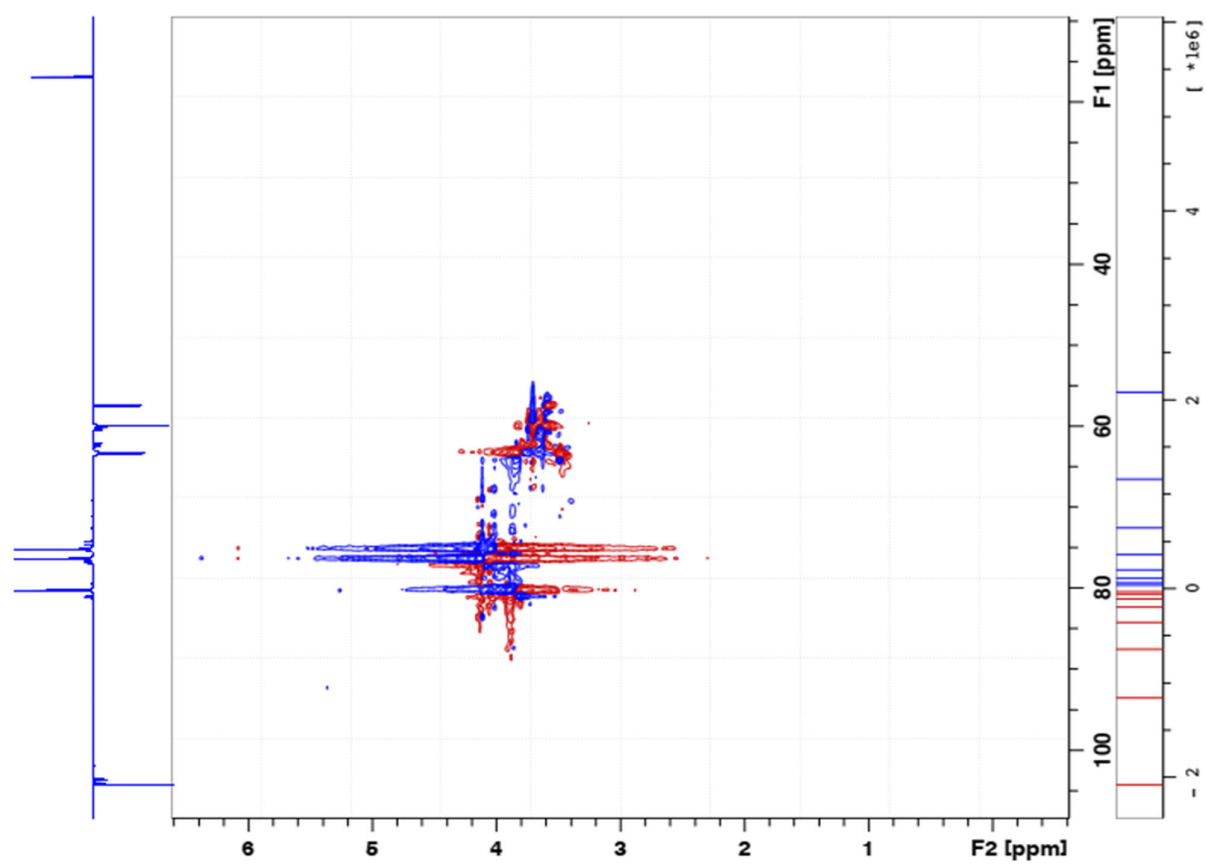

Figure S2.  $^{13}\text{C}$  HMBC spectrum of the dialyzed EPS
